# Supplementary material for: Misalignment of the Desired and Measured Center of Pressure Describes Falls Caused by Slip during Turning
Source: PLoS One. 2016 May 11;11(5):e0155418. doi: 10.1371/journal.pone.0155418 (PMC4864216; doi:10.1371/journal.pone.0155418)
Supplement: S1 Table — (XLSX) [file pone.0155418.s001.xlsx]

## Sheet: no-slip trial
xdCOP-xmCOP [m]	ydCOP-ymCOP [m]
0.192881	0.356465
0.0635517	0.391344
-0.0610418	0.458079
-0.0297379	0.240758
0.0237394	0.262802
0.068167	0.174731
0.0500523	0.215886
0.100743	0.422272
0.0618604	0.628825
0.143902	0.505547
0.0541394	0.425516
0.0974461	0.239307
0.047954	0.348898
0.155303	0.185983
0.210029	0.305784
0.0904727	0.421722
0.000681046	0.22067
0.0126726	0.179265
-0.0498105	0.235205
-0.0510975	0.260049
-0.0879648	0.146301
0.0216321	0.51054

## Sheet: slip trial without fall
xdCOP-xmCOP [m]	ydCOP-ymCOP [m]
0.117457	0.314791
0.46618	0.276005
0.140113	0.209833
0.297847	0.534065
0.103433	0.212238
0.266903	0.235259
0.0926035	0.601821
0.435258	0.313012
0.313469	0.350439
0.231273	0.31687
-0.0629083	0.0930626
0.331894	-0.0611041
0.115042	0.299694
0.06295	0.13552
0.00792063	0.397108
0.151573	0.140249
0.0602086	0.296628
0.459077	0.393012
0.687282	0.490259
0.33505	0.636138
0.463866	0.548947
0.352376	0.453533
0.808251	0.32299
0.434835	0.167534
0.543968	-0.00618996
0.0553889	0.326993
0.665969	0.15824
0.498159	-0.254583
0.332975	0.0375541
0.379934	0.487116
0.0897617	0.436088
0.586516	0.185281
0.190255	0.392423
0.134323	0.346025
0.313537	0.280115
0.402943	0.518443
0.325804	0.905107
-0.113342	0.510853
0.50725	0.817644
0.231106	0.490209

## Sheet: slip trial with fall
xdCOP-xmCOP [m]	ydCOP-ymCOP [m]
0.54762	0.97598
0.92368	0.215702
0.777462	-0.208082
0.86295	0.204087
1.14623	0.433776
0.892276	0.439259
0.661434	0.245143
0.661215	0.377809
0.479498	0.253583
0.601234	0.446363
0.786213	0.114105
0.750155	-0.359778
0.349804	0.457379
0.546557	0.597929
0.708863	0.428778
